# Supplementary material for: Pd-catalysed reactions of alkynes with model distannanes and poly[di-(n-butyl)]stannane
Source: Royal Society of Chemistry journal article supplement (doi:10.1039/c2dt31999c), 2012-11-19
Supplement: c2dt31999c.pdf [file c2dt31999c.pdf]

## Supplementary Data For Pd-catalyzed Reactions of Alkynes with Model Distannanes and Poly[di-(*n*-butyl)]stannanes

| Table of contents                                                                                                                            | Page No. |
|----------------------------------------------------------------------------------------------------------------------------------------------|----------|
| <b>List of figures</b>                                                                                                                       |          |
| 1. Figure S1 <sup>119</sup> Sn NMR of <b>4a</b>                                                                                              | ii       |
| 2. Figure S2 <sup>119</sup> Sn NMR of <b>4b</b>                                                                                              | ii       |
| 3. Figure S3 <sup>119</sup> Sn NMR of <b>5a</b>                                                                                              | iii      |
| 4. Figure S4 <sup>119</sup> Sn NMR of <b>5b</b>                                                                                              | iii      |
| 5. Figure S5 <sup>119</sup> Sn NMR of <b>9</b>                                                                                               | iv       |
| 6. Figure S6 <sup>119</sup> Sn NMR of <b>12</b>                                                                                              | iv       |
| 7. Figure S7 <sup>119</sup> Sn NMR of <b>13a</b>                                                                                             | v        |
| 8. Figure S8 <sup>119</sup> Sn NMR of <b>13b</b>                                                                                             | v        |
| <b>List of tables</b>                                                                                                                        |          |
| Table S1. Selected bond lengths (Å) and bond angles (°) for <b>9</b> as measured<br>(X-ray) and calculated                                   | vi       |
| Table S2. Calculated HOMO/LUMO energies for <b>3a</b> , <b>3b</b> , <b>4a</b> , <b>4b</b> , <b>5a</b> , <b>5b</b> and <b>9</b>               | vi       |
| Table S3. Crystal data and structure refinement for <b>9</b>                                                                                 | vii      |
| Table S4. Atomic coordinates ( $\times 10^4$ ) and equivalent isotropic displacement<br>parameters ( $\text{Å}^2 \times 10^3$ ) for <b>9</b> | viii     |
| Table S5. Bond lengths [Å] and angles [°] for <b>9</b>                                                                                       | ix       |
| Table S6. Anisotropic displacement parameters ( $\text{Å}^2 \times 10^3$ ) for <b>9</b>                                                      | xi       |
| Table S7. Hydrogen coordinates ( $\times 10^4$ ) and isotropic displacement<br>parameters ( $\text{Å}^2 \times 10^3$ ) for <b>9</b>          | xii      |

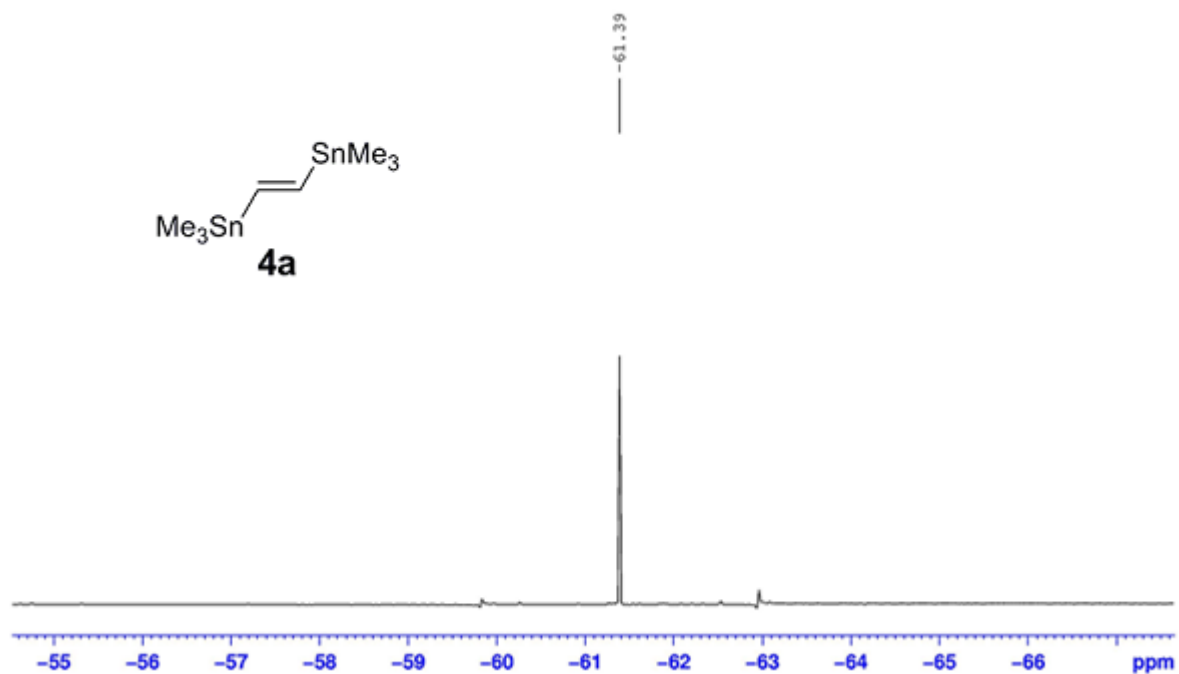

**Figure S1:**  $^{119}\text{Sn}$  NMR of **4a**

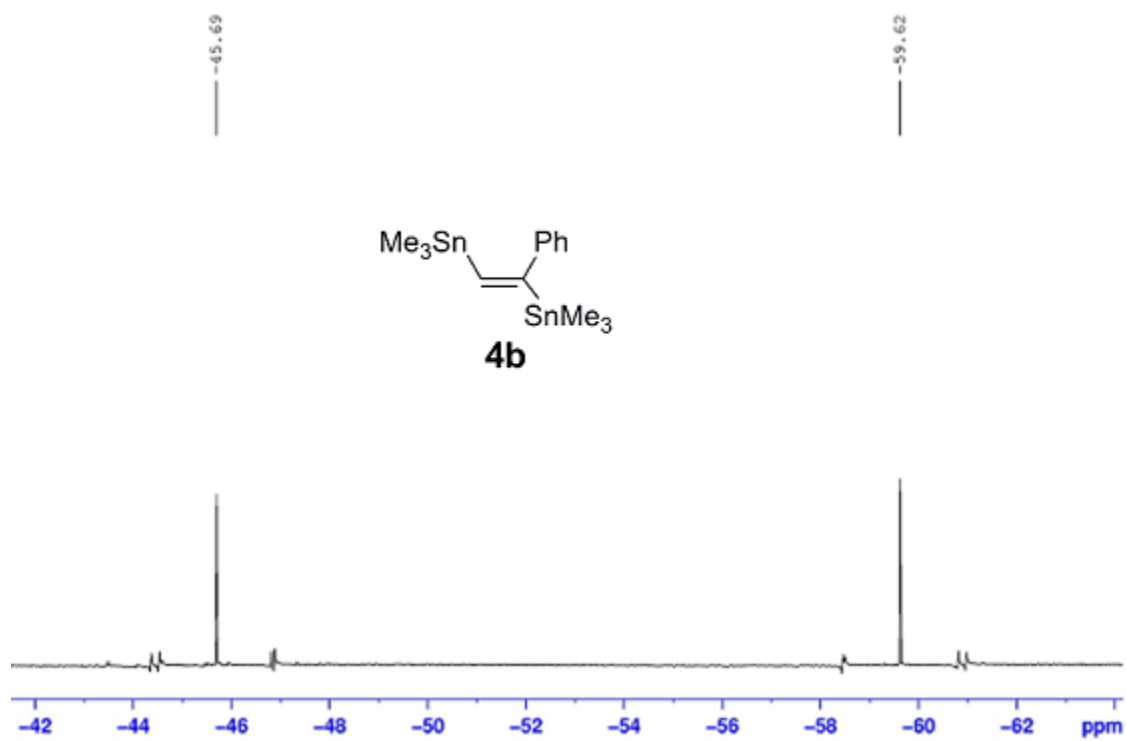

**Figure S2:**  $^{119}\text{Sn}$  NMR of **4b**

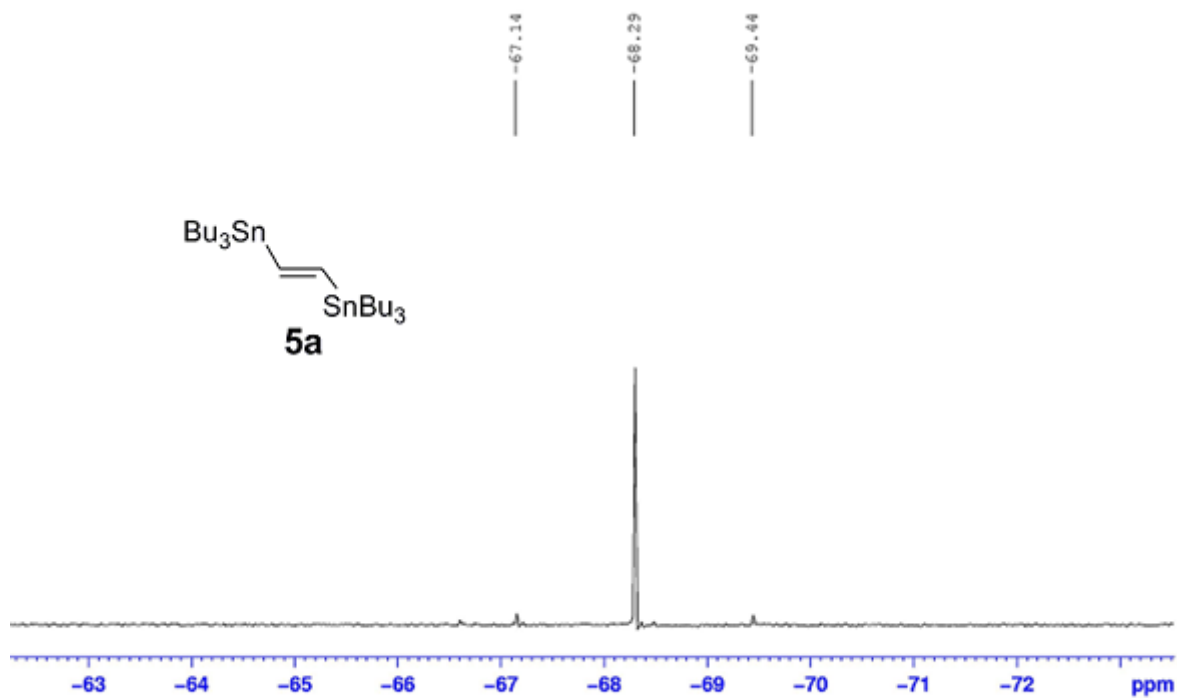

**Figure S3:**  $^{119}\text{Sn}$  NMR of **5a**

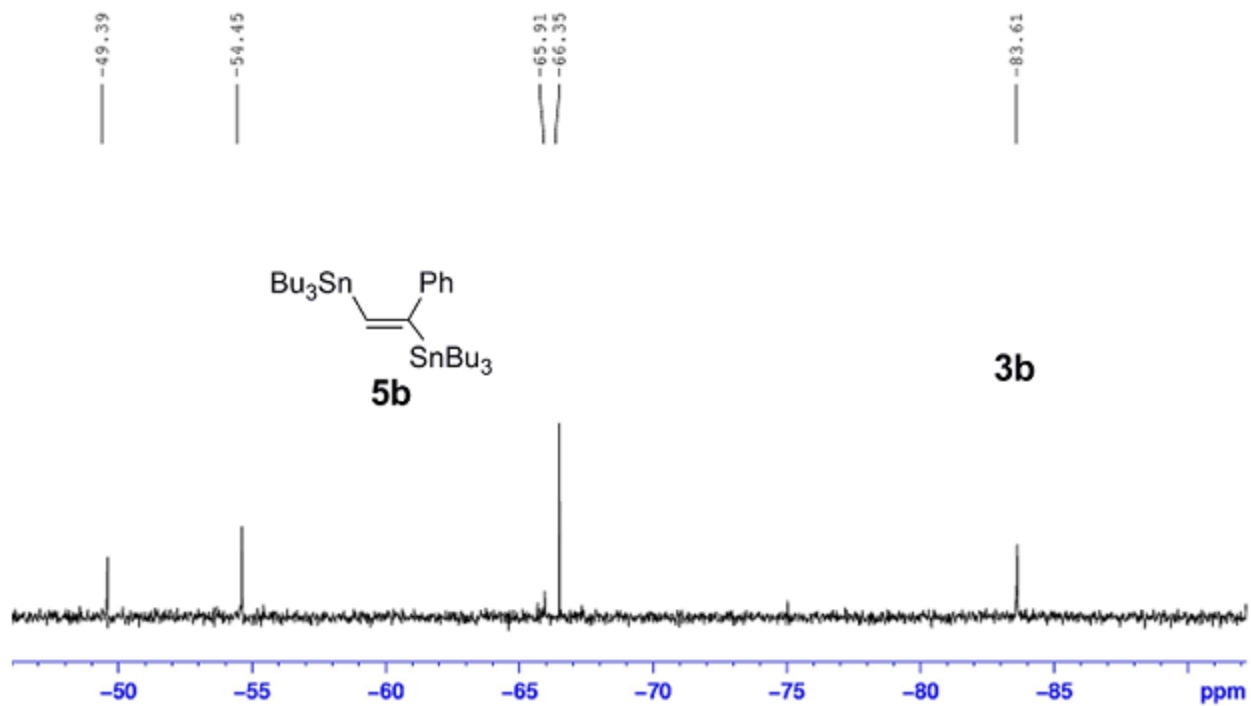

**Figure S4:**  $^{119}\text{Sn}$  NMR of **5b**

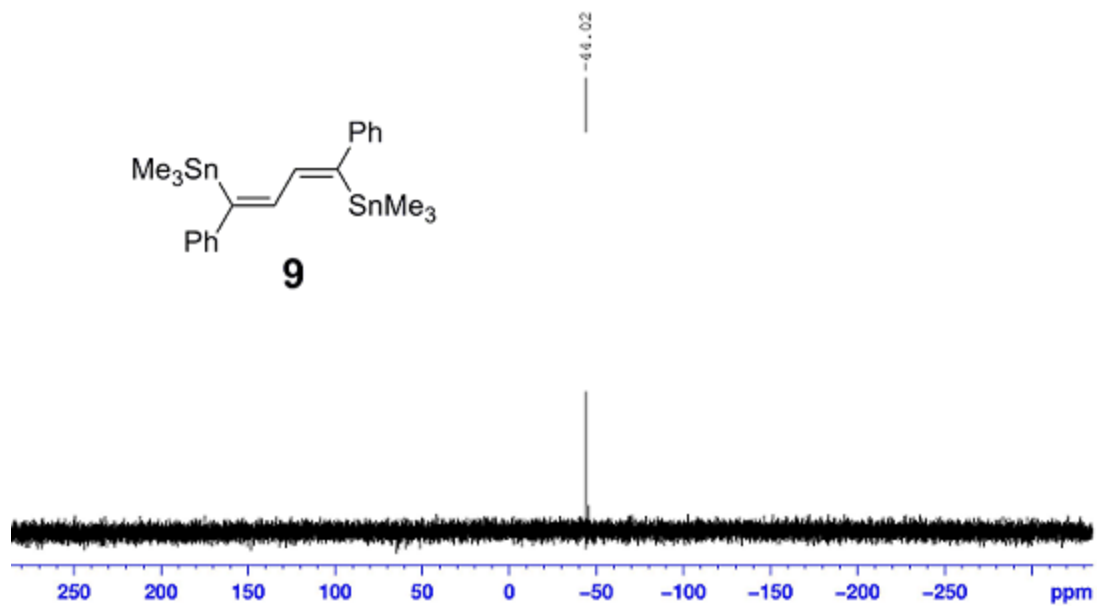

Figure S5: <sup>119</sup>Sn NMR of **9**

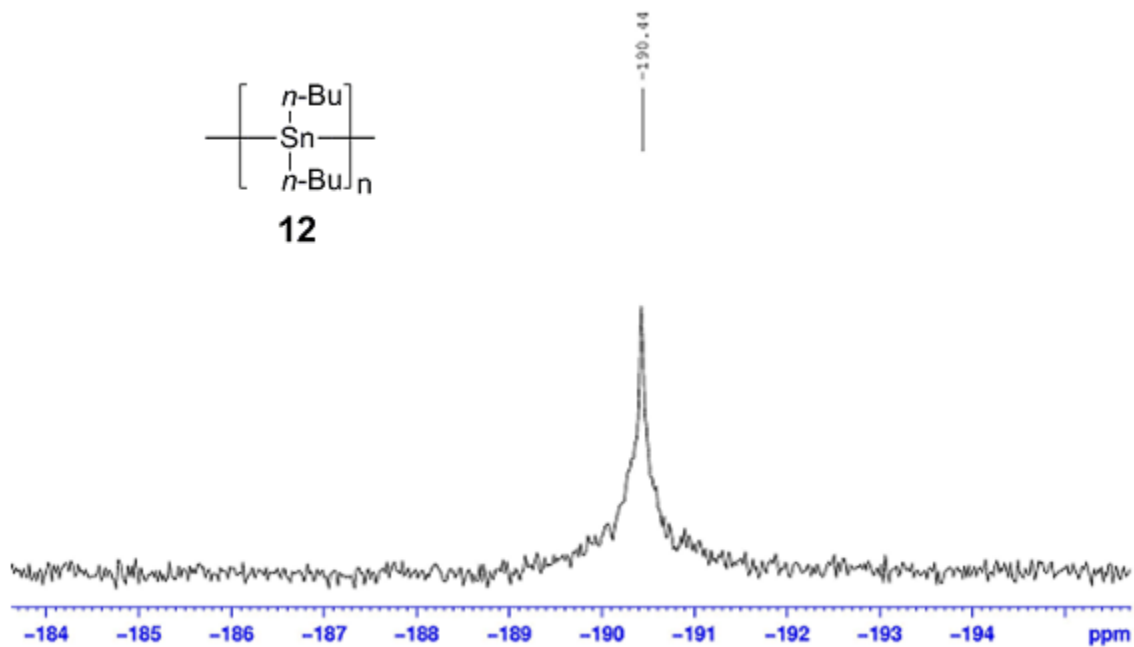

Figure S6: <sup>119</sup>Sn NMR of **12**

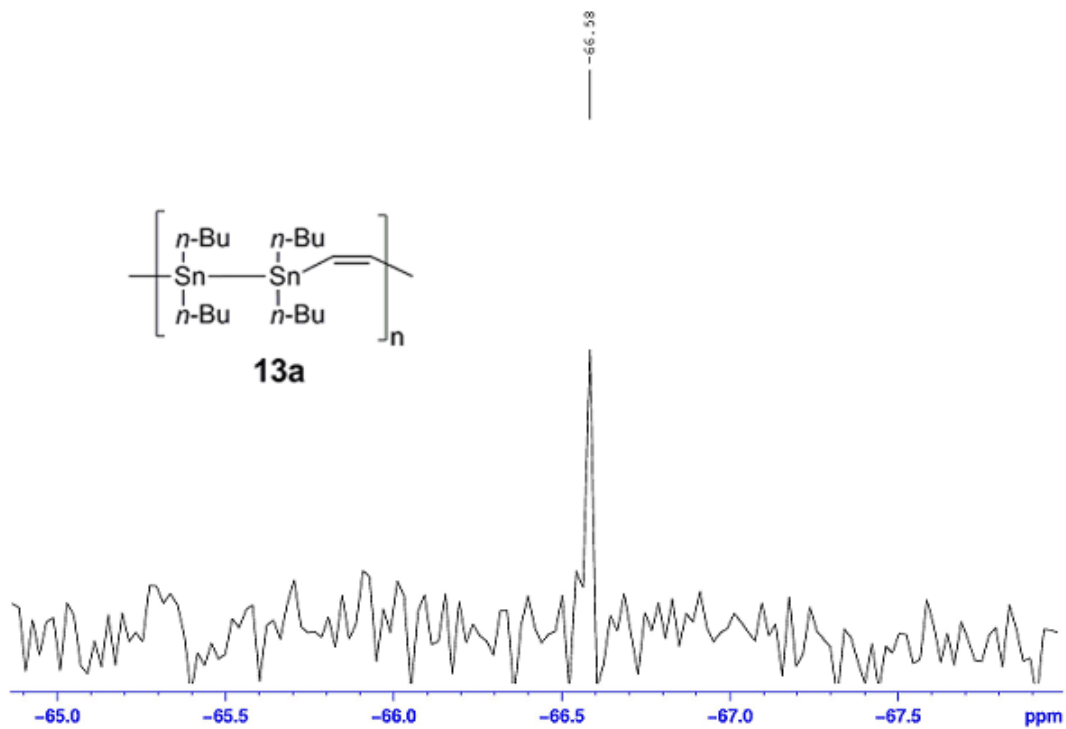

Figure S7: <sup>119</sup>Sn NMR of 13a

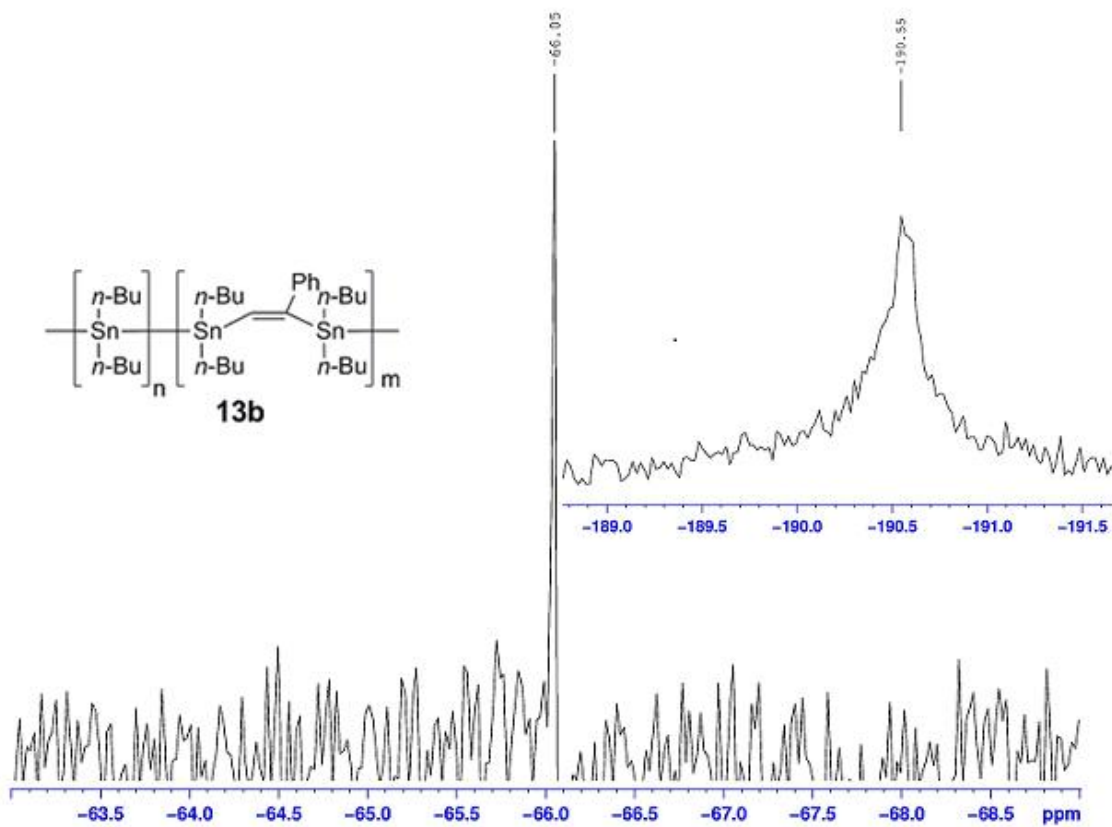

Figure S8: <sup>119</sup>Sn NMR of 13b

|                 | X-ray     | DFT (B3LYP 6-31G*) |
|-----------------|-----------|--------------------|
| Sn(1)-C(4)      | 2.189(13) | 2.172              |
| Sn(2)-C(1)      | 2.148(14) | 2.171              |
| C(1)-C(2)       | 1.37(2)   | 1.359              |
| C(1)-C(5)       | 1.481(19) | 1.485              |
| C(2)-C(3)       | 1.445(18) | 1.449              |
| C(3)-C(4)       | 1.343(19) | 1.359              |
| C(4)-C(11)      | 1.501(18) | 1.485              |
| C(3)-C(4)-Sn(1) | 120.4(10) | 124.3              |
| C(1)-C(2)-C(3)  | 125.2(12) | 127.02             |
| C(4)-C(3)-C(2)  | 128.0(12) | 127.0              |

**Table S1:** Selected bond lengths (Å) and bond angles (°) for **9** as measured (X-ray) and calculated. In parentheses estimated standard deviations are given.

| Compound  | HOMO (eV) | LUMO (eV) | Difference (eV) |
|-----------|-----------|-----------|-----------------|
| <b>3a</b> | -6.22     | 0.44      | 5.18            |
| <b>3b</b> | -5.93     | 0.41      | 5.52            |
| <b>4a</b> | -6.43     | -0.14     | 6.29            |
| <b>4b</b> | -6.02     | -0.45     | 5.57            |
| <b>5a</b> | -6.23     | -0.15     | 6.08            |
| <b>5b</b> | -5.91     | -0.56     | 5.35            |
| <b>9</b>  | -5.45     | -1.38     | 4.07            |

**Table S2:** Calculated HOMO/LUMO energies for Tin containing compounds

**Crystal data of 9:**

**Table S3.** Crystal data and structure refinement for **9**.

|                                   |                                                 |          |
|-----------------------------------|-------------------------------------------------|----------|
| Identification code               | k1059a                                          |          |
| Empirical formula                 | C <sub>22</sub> H <sub>30</sub> Sn <sub>2</sub> |          |
| Formula weight                    | 531.84                                          |          |
| Temperature                       | 150(1) K                                        |          |
| Wavelength                        | 0.71073 Å                                       |          |
| Crystal system                    | Orthorhombic                                    |          |
| Space group                       | P c a 21                                        |          |
| Unit cell dimensions              | a = 16.1862(3) Å                                | a = 90°. |
|                                   | b = 6.2126(6) Å                                 | b = 90°. |
|                                   | c = 22.2214(11) Å                               | g = 90°. |
| Volume                            | 2234.5(2) Å <sup>3</sup>                        |          |
| Z                                 | 4                                               |          |
| Density (calculated)              | 1.581 Mg/m <sup>3</sup>                         |          |
| Absorption coefficient            | 2.236 mm <sup>-1</sup>                          |          |
| F(000)                            | 1048                                            |          |
| Crystal size                      | 0.16 × 0.10 × 0.10 mm <sup>3</sup>              |          |
| Theta range for data collection   | 2.68 to 27.46°.                                 |          |
| Index ranges                      | -20 ≤ h ≤ 21, -8 ≤ k ≤ 8, -22 ≤ l ≤ 28          |          |
| Reflections collected             | 13220                                           |          |
| Independent reflections           | 4024 [R(int) = 0.0906]                          |          |
| Completeness to theta = 27.46°    | 99.3 %                                          |          |
| Absorption correction             | Semi-empirical from equivalents                 |          |
| Max. and min. transmission        | 0.767 and 0.658                                 |          |
| Refinement method                 | Full-matrix least-squares on F <sup>2</sup>     |          |
| Data / restraints / parameters    | 4024 / 1 / 222                                  |          |
| Goodness-of-fit on F <sup>2</sup> | 1.036                                           |          |
| Final R indices [I > 2σ(I)]       | R1 = 0.0590, wR2 = 0.1328                       |          |
| R indices (all data)              | R1 = 0.1033, wR2 = 0.1620                       |          |
| Absolute structure parameter      | 0.58(9)                                         |          |
| Largest diff. peak and hole       | 2.028 and -1.675 e.Å <sup>-3</sup>              |          |

**Table S4.** Atomic coordinates ( $\times 10^4$ ) and equivalent isotropic displacement parameters ( $\text{\AA}^2 \times 10^3$ ) for **9**.  $U(\text{eq})$  is defined as one third of the trace of the orthogonalized  $U_{ij}$  tensor.

|       | x        | y         | z        | $U(\text{eq})$ |
|-------|----------|-----------|----------|----------------|
| Sn(1) | 5647(1)  | 8269(1)   | 2090(1)  | 36(1)          |
| Sn(2) | 3243(1)  | 7029(1)   | 4328(1)  | 36(1)          |
| C(1)  | 4436(8)  | 6250(20)  | 3967(7)  | 31(3)          |
| C(2)  | 4697(8)  | 6970(20)  | 3417(6)  | 34(3)          |
| C(3)  | 4244(8)  | 8440(20)  | 3034(6)  | 36(3)          |
| C(4)  | 4468(8)  | 9210(20)  | 2494(6)  | 35(3)          |
| C(5)  | 4979(8)  | 4780(20)  | 4311(8)  | 38(3)          |
| C(6)  | 5209(8)  | 2800(20)  | 4123(8)  | 44(4)          |
| C(7)  | 5696(7)  | 1350(20)  | 4400(8)  | 41(4)          |
| C(8)  | 5952(9)  | 1890(30)  | 4972(7)  | 46(4)          |
| C(9)  | 5727(10) | 3910(30)  | 5218(8)  | 48(4)          |
| C(10) | 5245(9)  | 5330(30)  | 4892(7)  | 49(4)          |
| C(11) | 3921(7)  | 10756(18) | 2160(7)  | 30(3)          |
| C(12) | 3660(9)  | 10380(30) | 1577(7)  | 49(4)          |
| C(13) | 3151(9)  | 11810(30) | 1282(7)  | 47(4)          |
| C(14) | 2928(9)  | 13690(30) | 1572(8)  | 51(4)          |
| C(15) | 3194(7)  | 14180(20) | 2142(8)  | 41(3)          |
| C(16) | 3690(7)  | 12640(20) | 2445(6)  | 32(3)          |
| C(17) | 5756(9)  | 9590(30)  | 1216(9)  | 51(5)          |
| C(18) | 6587(9)  | 9530(30)  | 2665(8)  | 52(4)          |
| C(19) | 5716(7)  | 4910(20)  | 2047(9)  | 45(4)          |
| C(20) | 3077(10) | 10399(19) | 4405(12) | 64(6)          |
| C(21) | 2347(9)  | 5620(30)  | 3740(7)  | 48(4)          |
| C(22) | 3135(10) | 5700(30)  | 5223(7)  | 51(4)          |



**Table S5.** Bond lengths [Å] and angles [°] for **9**.

---

|                   |           |
|-------------------|-----------|
| Sn(1)-C(19)       | 2.090(14) |
| Sn(1)-C(17)       | 2.115(19) |
| Sn(1)-C(18)       | 2.135(16) |
| Sn(1)-C(4)        | 2.189(13) |
| Sn(2)-C(20)       | 2.117(12) |
| Sn(2)-C(21)       | 2.140(15) |
| Sn(2)-C(1)        | 2.148(14) |
| Sn(2)-C(22)       | 2.160(15) |
| C(1)-C(2)         | 1.37(2)   |
| C(1)-C(5)         | 1.481(19) |
| C(2)-C(3)         | 1.445(18) |
| C(3)-C(4)         | 1.343(19) |
| C(4)-C(11)        | 1.501(18) |
| C(5)-C(6)         | 1.354(18) |
| C(5)-C(10)        | 1.40(2)   |
| C(6)-C(7)         | 1.342(19) |
| C(7)-C(8)         | 1.38(2)   |
| C(8)-C(9)         | 1.41(2)   |
| C(9)-C(10)        | 1.38(2)   |
| C(11)-C(12)       | 1.38(2)   |
| C(11)-C(16)       | 1.385(18) |
| C(12)-C(13)       | 1.38(2)   |
| C(13)-C(14)       | 1.38(2)   |
| C(14)-C(15)       | 1.37(2)   |
| C(15)-C(16)       | 1.416(19) |
| <br>              |           |
| C(19)-Sn(1)-C(17) | 109.8(7)  |
| C(19)-Sn(1)-C(18) | 110.9(7)  |
| C(17)-Sn(1)-C(18) | 110.4(6)  |
| C(19)-Sn(1)-C(4)  | 109.4(5)  |
| C(17)-Sn(1)-C(4)  | 110.2(5)  |
| C(18)-Sn(1)-C(4)  | 106.1(6)  |
| C(20)-Sn(2)-C(21) | 111.6(8)  |
| C(20)-Sn(2)-C(1)  | 111.5(6)  |

|                   |           |
|-------------------|-----------|
| C(21)-Sn(2)-C(1)  | 106.8(6)  |
| C(20)-Sn(2)-C(22) | 107.2(9)  |
| C(21)-Sn(2)-C(22) | 110.5(6)  |
| C(1)-Sn(2)-C(22)  | 109.3(6)  |
| C(2)-C(1)-C(5)    | 118.8(13) |
| C(2)-C(1)-Sn(2)   | 122.5(10) |
| C(5)-C(1)-Sn(2)   | 118.7(10) |
| C(1)-C(2)-C(3)    | 125.2(12) |
| C(4)-C(3)-C(2)    | 128.0(12) |
| C(3)-C(4)-C(11)   | 120.8(12) |
| C(3)-C(4)-Sn(1)   | 120.4(10) |
| C(11)-C(4)-Sn(1)  | 118.8(9)  |
| C(6)-C(5)-C(10)   | 114.9(13) |
| C(6)-C(5)-C(1)    | 124.3(15) |
| C(10)-C(5)-C(1)   | 120.6(13) |
| C(7)-C(6)-C(5)    | 128.9(16) |
| C(6)-C(7)-C(8)    | 116.0(14) |
| C(7)-C(8)-C(9)    | 119.5(13) |
| C(10)-C(9)-C(8)   | 120.6(16) |
| C(9)-C(10)-C(5)   | 120.0(15) |
| C(12)-C(11)-C(16) | 119.2(12) |
| C(12)-C(11)-C(4)  | 122.4(13) |
| C(16)-C(11)-C(4)  | 118.4(13) |
| C(13)-C(12)-C(11) | 121.5(15) |
| C(12)-C(13)-C(14) | 118.6(15) |
| C(15)-C(14)-C(13) | 122.3(14) |
| C(14)-C(15)-C(16) | 118.0(13) |
| C(11)-C(16)-C(15) | 120.3(13) |

---

Symmetry transformations used to generate equivalent atoms:

**Table S6.** Anisotropic displacement parameters ( $\text{\AA}^2 \times 10^3$ ) for **9**. The anisotropic displacement factor exponent takes the form:  $-2p^2[ h^2 a^*2U^{11} + \dots + 2 h k a^* b^* U^{12} ]$

|       | U <sup>11</sup> | U <sup>22</sup> | U <sup>33</sup> | U <sup>23</sup> | U <sup>13</sup> | U <sup>12</sup> |
|-------|-----------------|-----------------|-----------------|-----------------|-----------------|-----------------|
| Sn(1) | 35(1)           | 35(1)           | 38(1)           | -1(1)           | 4(1)            | 1(1)            |
| Sn(2) | 36(1)           | 37(1)           | 36(1)           | 1(1)            | 3(1)            | 2(1)            |
| C(1)  | 32(8)           | 36(7)           | 27(8)           | 3(6)            | 2(6)            | -5(6)           |
| C(2)  | 26(7)           | 45(8)           | 30(7)           | -6(6)           | 1(6)            | 5(6)            |
| C(3)  | 37(7)           | 34(7)           | 38(8)           | 3(6)            | 15(7)           | 1(6)            |
| C(4)  | 29(7)           | 44(8)           | 31(8)           | -3(7)           | 14(6)           | 5(6)            |
| C(5)  | 41(7)           | 35(7)           | 39(8)           | 12(9)           | -4(9)           | 4(5)            |
| C(6)  | 38(7)           | 17(6)           | 75(13)          | 4(7)            | 5(7)            | -6(6)           |
| C(7)  | 26(7)           | 38(7)           | 58(11)          | 3(8)            | -2(8)           | 8(5)            |
| C(8)  | 42(8)           | 58(10)          | 37(9)           | 29(8)           | -10(7)          | -7(7)           |
| C(9)  | 56(11)          | 51(10)          | 36(10)          | 2(8)            | -17(8)          | 2(8)            |
| C(10) | 63(10)          | 55(10)          | 28(9)           | -3(8)           | -2(8)           | -5(8)           |
| C(11) | 24(6)           | 24(6)           | 41(8)           | 16(7)           | -7(7)           | -4(5)           |
| C(12) | 43(8)           | 61(11)          | 44(10)          | -3(9)           | 7(8)            | 9(8)            |
| C(13) | 55(10)          | 69(11)          | 18(7)           | -9(7)           | -6(7)           | 28(9)           |
| C(14) | 39(8)           | 66(11)          | 47(10)          | 13(9)           | -5(8)           | 12(7)           |
| C(15) | 48(8)           | 27(6)           | 47(9)           | 1(7)            | 15(9)           | 3(5)            |
| C(16) | 23(6)           | 54(9)           | 21(7)           | 7(6)            | 0(5)            | 7(6)            |
| C(17) | 40(9)           | 43(9)           | 69(13)          | -5(8)           | 11(8)           | -4(7)           |
| C(18) | 41(9)           | 69(12)          | 48(10)          | -1(9)           | 3(8)            | 8(8)            |
| C(19) | 35(7)           | 67(10)          | 33(9)           | 6(10)           | 9(8)            | -16(7)          |
| C(20) | 78(11)          | 14(6)           | 100(16)         | 7(10)           | 28(13)          | 7(6)            |
| C(21) | 44(9)           | 58(10)          | 41(9)           | 4(8)            | 5(8)            | -14(7)          |
| C(22) | 70(12)          | 64(11)          | 18(8)           | 13(7)           | -12(8)          | 4(9)            |

**Table S7.**Hydrogen coordinates ( $\times 10^4$ ) and isotropic displacement parameters ( $\text{\AA}^2 \times 10^3$ ) for **9**.

|        | x    | y     | z    | U(eq) |
|--------|------|-------|------|-------|
| H(2A)  | 5218 | 6478  | 3277 | 41    |
| H(3A)  | 3724 | 8906  | 3182 | 44    |
| H(6A)  | 4997 | 2366  | 3743 | 52    |
| H(7A)  | 5854 | 42    | 4212 | 49    |
| H(8A)  | 6278 | 913   | 5200 | 55    |
| H(9A)  | 5908 | 4289  | 5610 | 57    |
| H(10A) | 5094 | 6677  | 5061 | 58    |
| H(12A) | 3837 | 9117  | 1375 | 59    |
| H(13A) | 2957 | 11509 | 888  | 57    |
| H(14A) | 2579 | 14680 | 1369 | 61    |
| H(15A) | 3049 | 15501 | 2328 | 49    |
| H(16A) | 3866 | 12913 | 2846 | 39    |
| H(17A) | 6330 | 10016 | 1144 | 76    |
| H(17B) | 5396 | 10847 | 1180 | 76    |
| H(17C) | 5593 | 8504  | 918  | 76    |
| H(18A) | 6357 | 9779  | 3067 | 79    |
| H(18B) | 6790 | 10895 | 2500 | 79    |
| H(18C) | 7043 | 8501  | 2692 | 79    |
| H(19A) | 5913 | 4349  | 2432 | 67    |
| H(19B) | 6100 | 4492  | 1726 | 67    |
| H(19C) | 5167 | 4324  | 1960 | 67    |
| H(20A) | 3094 | 11052 | 4003 | 96    |
| H(20B) | 3520 | 11006 | 4653 | 96    |
| H(20C) | 2542 | 10697 | 4592 | 96    |
| H(21A) | 2193 | 6662  | 3428 | 72    |
| H(21B) | 1855 | 5219  | 3972 | 72    |
| H(21C) | 2581 | 4334  | 3550 | 72    |
| H(22A) | 3461 | 6564  | 5504 | 76    |
| H(22B) | 3342 | 4214  | 5223 | 76    |
| H(22C) | 2554 | 5705  | 5346 | 76    |
